# Supplementary material for: Ajania pacifica (Nakai) K. Bremer and Humphries Extract Limits MYC Expression to Induce Apoptosis in Diffuse Large B Cell Lymphoma
Source: MDPI journal article supplement (doi:10.3390/cimb46050278), 2024-05-11
Supplement: s1 [file s1]

# Supplementary Table S1

## Subtypes and genetic abnormalities in DLBCL

| Cell lines | Subtypes  | Genetic Abnormalities                                                     |
|------------|-----------|---------------------------------------------------------------------------|
| Ly1        | GCB-DLBCL | BCL2 rearranged<br>BCL6 amplified<br>P53 mutated<br>MYC amplified         |
| DHL6       | GCB-DLBCL | BCL2 rearranged<br>AID, BCL6 amplified<br>P53 mutated<br>MYC translocated |
| U2932      | ABC-DLBCL | BCL2 amplified<br>BCL6 amplified<br>MYC wild type                         |

# Supplementary Table S2

## Plant extracts with anti-DLBCL effect

| No. | Scientific name                                                       | Part used    | Relative cell viability (%) |      |
|-----|-----------------------------------------------------------------------|--------------|-----------------------------|------|
|     |                                                                       |              | 48h                         | 72h  |
| 1   | <i>Celtis choseniana</i> Nakai                                        | Leaf, stem   | 99%                         | 65%  |
| 2   | <i>Eleocharis equisetiformis</i> (Meinsh.) B.Fedtsch.                 | Whole plant  | 89%                         | 99%  |
| 3   | <i>Populus nigra</i> var. <i>italica</i> Koehne                       | Whole plant  | 85%                         | 76%  |
| 4   | <i>Kerria japonica</i> (L.) DC.                                       | Whole plant  | 100%                        | 98%  |
| 5   | <i>Iris pseudacorus</i> L.                                            | Root         | 62%                         | 76%  |
| 6   | <i>Campsis grandiflora</i> (Thunb.) K.Schum.                          | Leaf         | 99%                         | 100% |
| 7   | <i>Elaeagnus multiflora</i> Thunb.                                    | Leaf, stem   | 96%                         | 99%  |
| 8   | <i>Diplazium subsinuatum</i> (Wall. ex Hook. & Grev.) Tagawa          | Leaf         | 90%                         | 100% |
| 9   | <i>Buddleja davidii</i> Franch.                                       | Leaf, Branch | 95%                         | 98%  |
| 10  | <i>Phyllostachys bambusoides</i> Siebold & Zucc.                      | Leaf, Branch | 100%                        | 93%  |
| 11  | <i>Cimicifuga japonica</i> (Thunb.) Spreng.                           | Whole plant  | 91%                         | 79%  |
| 12  | <i>Galinsoga ciliata</i> (Raf.) S.F.Blake                             | Whole plant  | 97%                         | 96%  |
| 13  | <i>Ilex integra</i> Thunb.                                            | Stem         | 100%                        | 98%  |
| 14  | <i>Lespedeza cuneata</i> G.Don                                        | Top part     | 81%                         | 63%  |
| 15  | <i>Tilia taquetii</i> C.K.Schneid.                                    | Leaf, Branch | 85%                         | 85%  |
| 16  | <i>Euonymus japonicus</i> 'Microphyllus'                              | Beanch       | 95%                         | 85%  |
| 17  | <i>Prunus sibirica</i> L.                                             | Branch       | 100%                        | 100% |
| 18  | <b><i>Boehmeria pannosa</i> Nakai &amp; Satake *</b>                  | Leaf, Stem   | 66%                         | 52%  |
| 19  | <i>Akebia quinata</i> (Houtt.) Decne.                                 | Leaf, Stem   | 100%                        | 94%  |
| 20  | <i>Celastrus stephanotiifolius</i> Makino                             | Branch       | 80%                         | 61%  |
| 21  | <i>Tritonia x crocosmiiflora</i> G.Nicholson                          | Whole plant  | 86%                         | 73%  |
| 22  | <i>Orixa japonica</i> Thunb.                                          | Leaf         | 74%                         | 67%  |
| 23  | <i>Eurya emarginata</i> (Thunb.) Makino                               | Leaf         | 95%                         | 61%  |
| 24  | <b><i>Ajania pacifica</i> (Nakai) K.Bremer &amp; Humphries *</b>      | Whole plant  | 67%                         | 45%  |
| 25  | <i>Strelitzia reginae</i> Banks                                       | Top part     | 100%                        | 88%  |
| 26  | <i>Inula britannica</i> var. <i>japonica</i> (Thunb.) Franch. & Sav.  | Whole plant  | 90%                         | 87%  |
| 27  | <i>Stellaria aquatica</i> (L.) Scop.                                  | Whole plant  | 83%                         | 98%  |
| 28  | <i>Aspidistra elatior</i> Blume                                       | Whole plant  | 98%                         | 100% |
| 29  | <i>Agave americana</i> L.                                             | Top part     | 99%                         | 99%  |
| 30  | <i>Zanthoxylum schinifolium</i> Siebold & Zucc.                       | Branch       | 89%                         | 68%  |
| 31  | <i>Ligustrum quihoui</i> var. <i>latifolium</i> Nakai                 | Branch       | 100%                        | 100% |
| 32  | <i>Quercus glauca</i> Thunb.                                          | Branch       | 100%                        | 99%  |
| 33  | <i>Justicia procumbens</i> L.                                         | Whole plant  | 97%                         | 86%  |
| 34  | <i>Crataegus pinnatifida</i> for. <i>pilosa</i> (C.K.Schneid.) Kitag. | Branch       | 100%                        | 93%  |
| 35  | <i>Meliosma oldhamii</i> Maxim.                                       | Leaf         | 98%                         | 94%  |
| 36  | <i>Salix caprea</i> L.                                                | Branch       | 87%                         | 89%  |
| 37  | <i>Damnacanthus indicus</i> C.F.Gaertn.                               | Leaf, Branch | 100%                        | 98%  |
| 38  | <i>Citrus tachibana</i> (Makino) Yu. Tanaka                           | Stem         | 100%                        | 100% |
| 39  | <i>Hibiscus hamabo</i> Siebold & Zucc.                                | Leaf         | 100%                        | 99%  |
| 40  | <i>Taxus cuspidata</i> var. <i>latifolia</i> (Pilg.) Nakai            | Branch       | 94%                         | 86%  |

# Supplementary Table S2

## Plant extracts with anti-DLBCL effect

| No. | Scientific name                                                    | Part used    | Relative cell viability (%) |      |
|-----|--------------------------------------------------------------------|--------------|-----------------------------|------|
|     |                                                                    |              | 48h                         | 72h  |
| 41  | <i>Dracocephalum argunense</i> Fisch. ex Link                      | Whole plant  | 99%                         | 100% |
| 42  | <i>Ficus erecta</i> var. <i>sieboldii</i> (Miq.) King              | Branch       | 100%                        | 100% |
| 43  | <b><i>Corydalis incisa</i> (Thunb.) Pers. *</b>                    | Whole plant  | 45%                         | 23%  |
| 44  | <i>Semiaquilegia adoxoides</i> (DC.) Makino                        | Whole plant  | 97%                         | 100% |
| 45  | <i>Stauntonia hexaphylla</i> (Thunb.) Decne.                       | Leaf, Stem   | 76%                         | 71%  |
| 46  | <i>Youngia japonica</i> (L.) DC.                                   | Whole plant  | 95%                         | 100% |
| 47  | <i>Torilis japonica</i> (Houtt.) DC.                               | Root         | 96%                         | 100% |
| 48  | <i>Vitex rotundifolia</i> L.f.                                     | Leaf, Stem   | 90%                         | 90%  |
| 49  | <i>Carpinus tschonoskii</i> Maxim.                                 | Branch, Leaf | 96%                         | 89%  |
| 50  | <i>Dryopteris crassirhizoma</i> Nakai                              | Top part     | 99%                         | 99%  |
| 51  | <i>Lagerstroemia indica</i> L.                                     | Branch       | 98%                         | 99%  |
| 52  | <i>Acer triflorum</i> Kom.                                         | Branch       | 98%                         | 94%  |
| 53  | <i>Sorbaria sorbifolia</i> var. <i>stellipila</i> Maxim.           | Branch       | 97%                         | 98%  |
| 54  | <i>Rubus oldhamii</i> Miq.                                         | Root         | 94%                         | 84%  |
| 55  | <i>Veronica persica</i> Poir.                                      | Whole plant  | 99%                         | 95%  |
| 56  | <i>Malus baccata</i> var. <i>mandshurica</i> (Maxim.) C.K.Schneid. | Branch       | 100%                        | 99%  |
| 57  | <b><i>Fatsia japonica</i> (Thunb.) Decne. &amp; Planch. *</b>      | Leaf, Stem   | 27%                         | 46%  |
| 58  | <i>Ligularia taquetii</i> (H.Lev. & Vaniot) Nakai                  | Whole plant  | 99%                         | 100% |
| 59  | <i>Caryopteris divaricata</i> (Siebold & Zucc.) Maxim.             | Top part     | 99%                         | 97%  |
| 60  | <i>Diplotaxis muralis</i> DC.                                      | Whole plant  | 95%                         | 98%  |
| 61  | <b><i>Isodon inflexus</i> (Thunb.) Kudo *</b>                      | Whole plant  | 38%                         | 47%  |
| 62  | <i>Carpinus laxiflora</i> (Siebold & Zucc.) Blume                  | Whole plant  | 78%                         | 69%  |
| 63  | <i>Lonicera praeflorens</i> Batalin                                | Branch       | 100%                        | 99%  |
| 64  | <i>Prunus speciosa</i> (Koidz.) Nakai                              | Branch       | 99%                         | 98%  |
| 65  | <i>Sisymbrium officinale</i> (L.) Scop.                            | Whole plant  | 97%                         | 95%  |
| 66  | <i>Leonurus japonicus</i> Houtt.                                   | Root         | 100%                        | 98%  |
| 67  | <i>Larix kaempferi</i> (Lamb.) Carriere                            | Branch       | 63%                         | 74%  |
| 68  | <i>Artemisia fukudo</i> Makino                                     | Whole plant  | 100%                        | 98%  |
| 69  | <i>Phryma leptostachya</i> var. <i>asiatica</i> H. Hara            | Whole plant  | 100%                        | 92%  |
| 70  | <i>Photinia glabra</i> (Thunb.) Maxim.                             | Leaf, Stem   | 78%                         | 86%  |
| 71  | <i>Corylopsis gotoana</i> var. <i>coreana</i> (Uyeki) T.Yamaz.     | Branch       | 89%                         | 88%  |
| 72  | <b><i>Ribes fasciculatum</i> var. <i>chinense</i> Maxim. *</b>     | Branch       | 56%                         | 58%  |
| 73  | <i>Metasequoia glyptostroboides</i> Hu & W.C.Cheng                 | Branch       | 76%                         | 66%  |
| 74  | <i>Arundo donax</i> L.                                             | Top part     | 100%                        | 100% |
| 75  | <i>Cercis chinensis</i> Bunge                                      | Branch       | 93%                         | 92%  |
| 76  | <i>Rhynchosia volubilis</i> Lour.                                  | Top part     | 99%                         | 98%  |
| 77  | <i>Spodiopogon sibiricus</i> Trin.                                 | Whole plant  | 92%                         | 80%  |
| 78  | <i>Canavalia lineata</i> (Thunb.) DC.                              | Whole plant  | 99%                         | 100% |
| 79  | <i>Ulmus laciniata</i> (Trautv.) Mayr                              | Leaf         | 96%                         | 78%  |
| 80  | <i>Fraxinus sieboldiana</i> var. <i>quadrijuga</i> (Nakai) T.B.Lee | Leaf         | 100%                        | 86%  |

# Supplementary Table S2

## Plant extracts with anti-DLBCL effect

| No. | Scientific name                                                    | Part used   | Relative cell viability (%) |      |
|-----|--------------------------------------------------------------------|-------------|-----------------------------|------|
|     |                                                                    |             | 48h                         | 72h  |
| 80  | <i>Fraxinus sieboldiana</i> var. <i>quadrijuga</i> (Nakai) T.B.Lee | Leaf        | 100%                        | 86%  |
| 81  | <i>Artemisia montana</i> (Nakai) Pamp.                             | Whole plant | 100%                        | 100% |
| 82  | <i>Pennisetum alopecuroides</i> (L.) Spreng.                       | Whole plant | 100%                        | 100% |
| 83  | <i>Malus sieboldii</i> (Regel) Rehder                              | Branch      | 100%                        | 96%  |
| 84  | <i>Idesia polycarpa</i> Maxim.                                     | Branch      | 77%                         | 63%  |
| 85  | <i>Boehmeria spicata</i> (Thunb.) Thunb.                           | Branch      | 97%                         | 99%  |
| 86  | <i>Prunus verecunda</i> var. <i>pendula</i> (Nakai) W.T.Lee        | Branch      | 100%                        | 97%  |
| 87  | <i>Clinopodium chinense</i> var. <i>parviflorum</i> (Kudo) H. Hara | Whole plant | 97%                         | 96%  |
| 88  | <i>Acer pictum</i> subsp. <i>mono</i> (Maxim.) Ohashi              | Leaf        | 90%                         | 92%  |
| 89  | <b><i>Cornus macrophylla</i> Wall. *</b>                           | Leaf        | 51%                         | 52%  |
| 90  | <i>Litsea japonica</i> (Thunb.) Juss.                              | Branch      | 56%                         | 68%  |
| 91  | <i>Sambucus sieboldiana</i> var. <i>pendula</i> (Nakai) T.B.Lee    | Leaf        | 97%                         | 82%  |
| 92  | <i>Sorghum halepense</i> for. <i>muticum</i> Hubb.                 | Whole Plant | 93%                         | 86%  |
| 93  | <i>Mirabilis jalapa</i> L.                                         | Whole plant | 96%                         | 97%  |
| 94  | <i>Aster arenarius</i> (Kitam.) Nemoto                             | Whole plant | 99%                         | 96%  |
| 95  | <i>Euodia daniellii</i> Hemsl.                                     | Leaf        | 99%                         | 85%  |
| 96  | <i>Osmanthus x fortune</i>                                         | Leaf        | 88%                         | 95%  |
| 97  | <i>Ligustrum obtusifolium</i> Siebold & Zucc.                      | Leaf        | 91%                         | 93%  |
| 98  | <i>Ficus erecta</i> Thunb.                                         | Branch      | 95%                         | 100% |
| 99  | <i>Gardneria insularis</i> Nakai                                   | Leaf        | 99%                         | 100% |
| 100 | <b><i>Rudbeckia bicolor</i> Nutt. *</b>                            | Seed        | 49%                         | 48%  |

The data shown are the relative cell viability percent tested by Trypan blue assay.

\* Potent anti-DLBCL activity against Ly1 cell line (<40% of control percentage 72h post-treatment.).

# Supplementary Figure S1

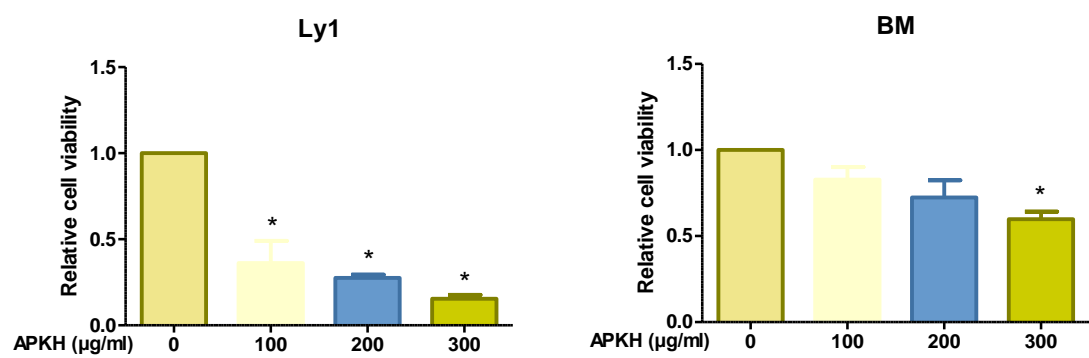

**Supplementary Figure S1. APKH cytotoxicity in Ly1 vs. BM cells.**

DLBCL Ly1 or normal bone marrow (BM) cells were exposed to APKH (0, 100, 200, or 300 µg/ml) for 24 h, and MTS assay was performed to measure cell viability. Statistical significance was analyzed using a two-tailed Student's t-test (\*p < 0.05).

## Supplementary Figure S2

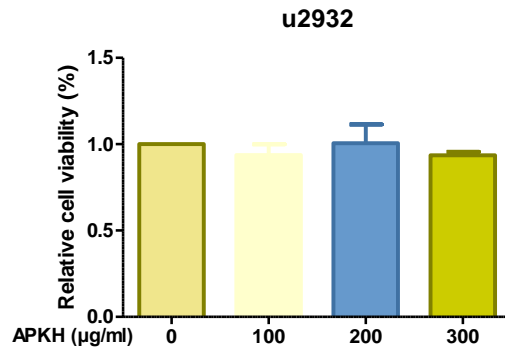

**Supplementary Figure S2. Treatment with APKH did not reduce cell viability in U2932 cells.**

U2932 cells were treated with APKH (0, 100, 200, or 300  $\mu\text{g/ml}$ ) for 24 h, and MTS assay was performed.

# Supplementary Figure S3

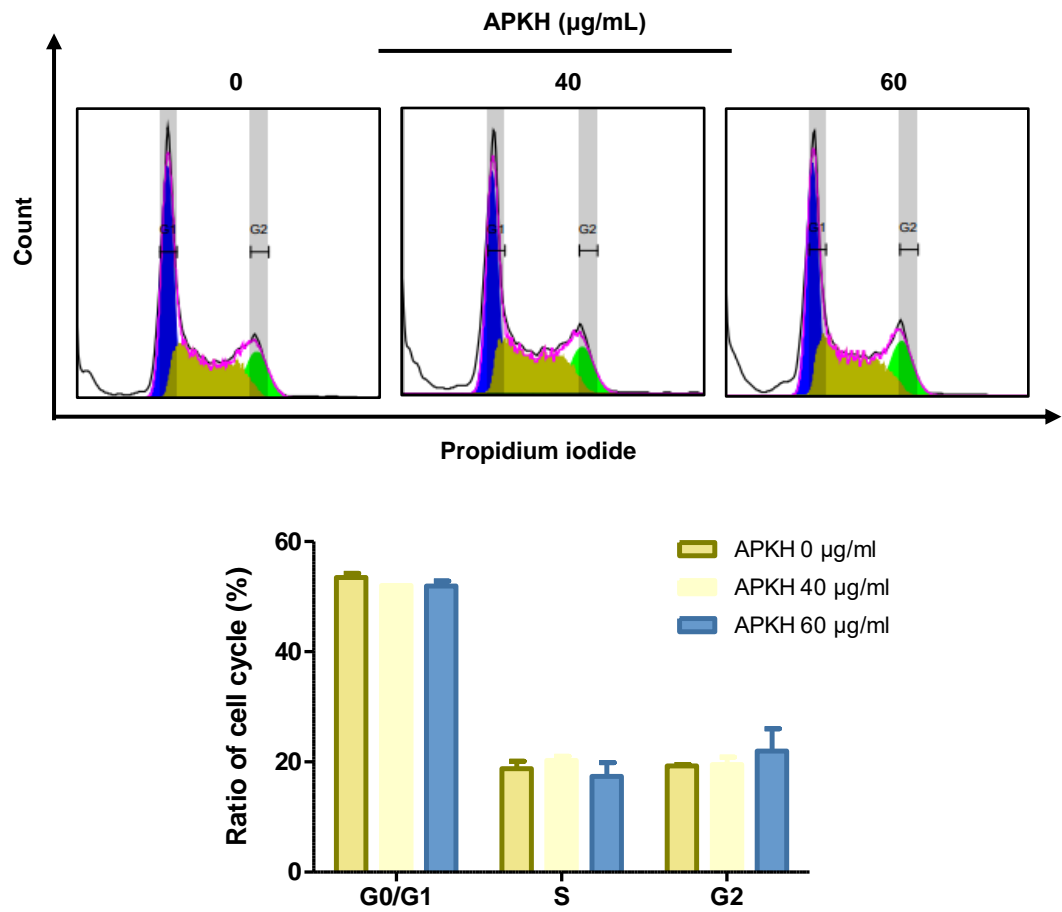

**Supplementary Figure S3. Ly1 DLBCL cells did not exhibit arrested cell cycle progression in response to APKH treatment.**  
Treatment of Ly1 cells with APKH for 24 h and analysis of cell cycle distribution by flow cytometry after staining with PI.

# Supplementary Figure S4

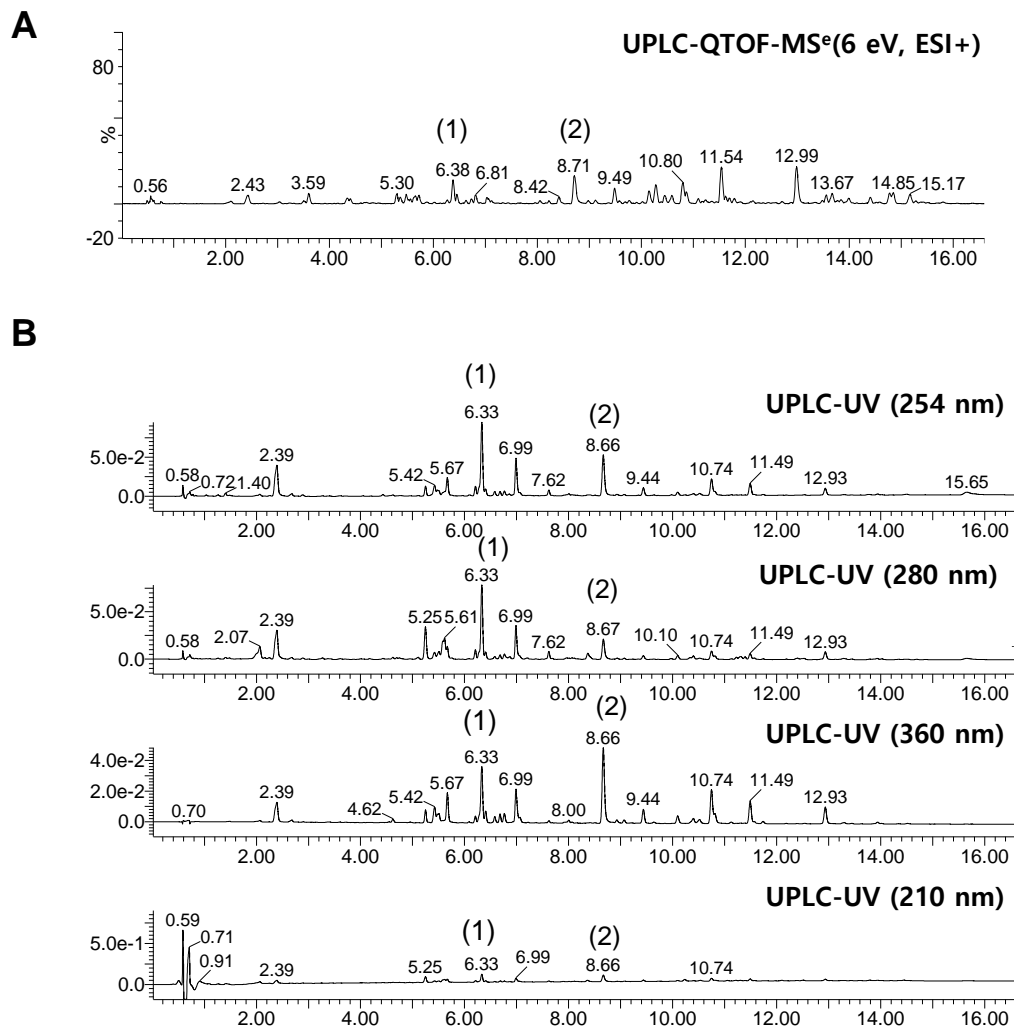

**Supplementary Figure S4. UPLC QTOF-MS analysis of APKH.**

(A) Positive ion mode. (B) Chromatographic profiles acquired under different UV wavelengths, including 254nm, 280nm, 360nm, and 210nm.



## Supplementary Figure S5

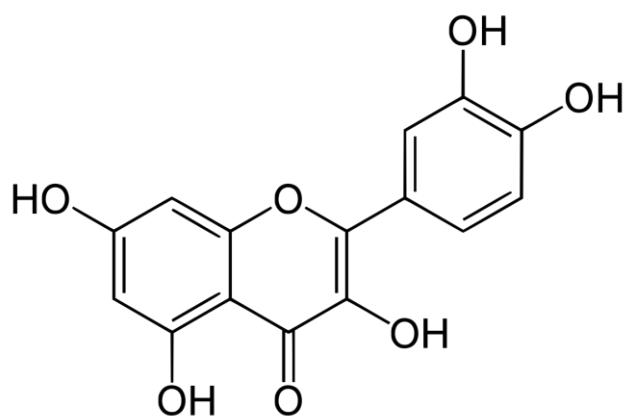

**Quercetin**

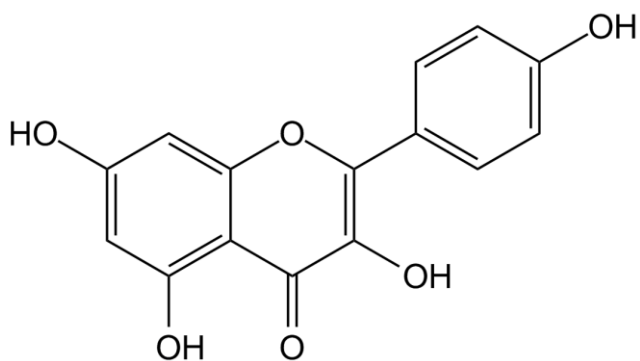

**Kaempferol**

Supplementary Figure S5. The molecular structure of quercetin and kaempferol.
